# Supplementary material
Source: PubMed Central journal article supplement (PMC3306235)
Supplement: NIHMS333075-supplement-Suppl_1.pdf [file NIHMS333075-supplement-Suppl_1.pdf]

Contact network parameters estimated separately for the holiday period versus the non-holiday period, and for 2–3 member households versus 4+ member households

*The Annals of Applied Statistics*

Gail E. Potter, Mark S. Handcock,  
Ira M. Longini, Jr., and M. Elizabeth Halloran

# 1 MLEs computed separately for the holiday period versus the non-holiday period

Table 1: The top matrix shows conditional contact probability estimates during the Easter holiday period (n=328) with 95% bootstrap confidence intervals. The bottom matrix shows conditional contact probability estimates during the non-holiday period (n=347).

| Age Category | 0-5                 | 6-11                 | 12-18                | 19-35                | 36+                  |
|--------------|---------------------|----------------------|----------------------|----------------------|----------------------|
| 0-5          | 1.00<br>[ - , 1.00] | 0.87<br>[0.73, 1.00] | 0.00<br>[0, 0.90]    | 0.97<br>[0.90, 1.00] | 1.00<br>[0.91, 1.00] |
| 6-11         |                     | 0.96<br>[0.72, 1.00] | 1.00<br>[0.84, 1.00] | 1.00<br>[0.96, 1.00] | 0.93<br>[0.82, 1.00] |
| 12-18        |                     |                      | 0.94<br>[0.79, 1.00] | 0.87<br>[0.71, 1.00] | 0.95<br>[0.88, 1.00] |
| 19-35        |                     |                      |                      | 0.74<br>[0.53, 0.92] | 0.88<br>[0.75, 0.98] |
| 36+          |                     |                      |                      |                      | 0.83<br>[0.68, 0.98] |

| Age Category | 0-5                  | 6-11                 | 12-18                | 19-35                | 36+                  |
|--------------|----------------------|----------------------|----------------------|----------------------|----------------------|
| 0-5          | 0.95<br>[0.73, 1.00] | 0.92<br>[0.67, 1.00] | 0.94<br>[0.46, 1.00] | 0.97<br>[0.84, 1.00] | 0.87<br>[0.69, 1.00] |
| 6-11         |                      | 1.00<br>[ - , 1.00]  | 1.00<br>[0.87, 1.00] | 0.73<br>[0.47, 1.00] | 0.83<br>[0.73, 0.95] |
| 12-18        |                      |                      | 0.80<br>[0.56, 1.00] | 0.28<br>[0.04, 0.57] | 0.87<br>[0.77, 0.95] |
| 19-35        |                      |                      |                      | 0.85<br>[0.66, 1.00] | 0.81<br>[0.72, 0.90] |
| 36+          |                      |                      |                      |                      | 0.93<br>[0.82, 1.00] |

Table 2: Estimated probabilities of being at home during the Easter holiday period (n=328) and during the non-holiday period (n=347) with 95% bootstrap confidence intervals.

| Holiday status | 0-5                  | 6-11                 | 12- 18               | 19-35                | 36+                  |
|----------------|----------------------|----------------------|----------------------|----------------------|----------------------|
| Holiday        | 0.91<br>[0.86, 0.96] | 0.92<br>[0.87, 0.98] | 0.89<br>[0.83, 0.96] | 0.94<br>[0.90, 0.99] | 0.93<br>[0.89, 0.98] |
| Non-holiday    | 0.91<br>[0.86, 1.00] | 1.00<br>[0.96, 1.00] | 0.89<br>[0.83, 0.99] | 0.85<br>[0.79, 0.92] | 0.91<br>[0.87, 0.96] |

## 2 MLEs computed separately for small (2–3) versus large (4+) households

Table 3: The top matrix shows conditional contact probability estimates in households with 2–3 members (n=352) with 95% bootstrap confidence intervals. The bottom matrix shows conditional contact probability estimates in households with 4+ members (n=323). The cell count for  $p_{0-5,6-11}$  in small households is 1, and that for  $p_{0-5,12-18}$  in small households is zero. A more refined model could restrict these two parameters to be equal for small and large households, but fit all other parameters separately.

| Age Category | 0-5                  | 6-11                 | 12-18                | 19-35                | 36+                  |
|--------------|----------------------|----------------------|----------------------|----------------------|----------------------|
| 0-5          | 1.00<br>[0.90, 1.00] | 0<br>[0, 0.90]       | NA                   | 1.00<br>[0.95, 1.00] | 1.00<br>[0.94, 1.00] |
| 6-11         |                      | 1.00<br>[0.90, 1.00] | 1.00<br>[0.90, 1.00] | 1.00<br>[0.81, 1.00] | 1.00<br>[0.88, 1.00] |
| 12-18        |                      |                      | 1.00<br>[0.74, 1.00] | 1.00<br>[0.35, 1.00] | 1.00<br>[0.87, 1.00] |
| 19-35        |                      |                      |                      | 1.00<br>[0.81, 1.00] | 0.87<br>[0.71, 0.99] |
| 36+          |                      |                      |                      |                      | 0.88<br>[0.73, 1.00] |

  

| Age Category | 0-5                  | 6-11                 | 12-18                | 19-35                | 36+                  |
|--------------|----------------------|----------------------|----------------------|----------------------|----------------------|
| 0-5          | 1.00<br>[0.97, 1.00] | 0.91<br>[0.78, 1.00] | 0.66<br>[0.25, 0.99] | 0.96<br>[0.87, 1.00] | 0.91<br>[0.81, 1.00] |
| 6-11         |                      | 1.00<br>[0.85, 1.00] | 1.00<br>[0.89, 1.00] | 0.96<br>[0.86, 1.00] | 0.88<br>[0.78, 0.96] |
| 12-18        |                      |                      | 0.87<br>[0.73, 0.99] | 0.63<br>[0.46, 0.81] | 0.90<br>[0.84, 0.95] |
| 19-35        |                      |                      |                      | 0.60<br>[0.39, 0.81] | 0.81<br>[0.70, 0.90] |
| 36+          |                      |                      |                      |                      | 0.94<br>[0.84, 1.00] |

Table 4: Estimated probabilities of being at home in households with 2–3 members (n=352) and in households with 4+ members (n=323), 95% bootstrap confidence intervals

| Household Size        | 0-5                  | 6-11                 | 12-18                | 19-35                | 36+                  |
|-----------------------|----------------------|----------------------|----------------------|----------------------|----------------------|
| 2-3 household members | 0.86<br>[0.77, 0.95] | 0.92<br>[0.81, 1.00] | 0.90<br>[0.80, 1.00] | 0.93<br>[0.89, 1.00] | 0.91<br>[0.85, 0.99] |
| 4+ household members  | 0.93<br>[0.88, 0.98] | 0.92<br>[0.88, 0.98] | 0.88<br>[0.83, 0.94] | 0.87<br>[0.81, 0.93] | 0.93<br>[0.90, 0.97] |
