# Supplementary material
Source: PubMed Central journal article supplement (PMC3306235)
Supplement: NIHMS333075-supplement-Suppl_2.pdf [file NIHMS333075-supplement-Suppl_2.pdf]

# Results from Simulation Study Exploring Weak Identifiability

*The Annals of Applied Statistics*

Gail E. Potter, Mark S. Handcock,  
Ira M. Longini, Jr., and M. Elizabeth Halloran

Table 1: Conditional contact probabilities used for simulations, mean estimated contact probabilities over 500 simulations, and 2.5% and 97.5% quantiles of the estimates.

| Age 1 | Age 2 | Truth | Mean of Estimates | 95 % Quantile Interval |
|-------|-------|-------|-------------------|------------------------|
| 0-5   | 0-5   | 0.4   | 0.57              | [0.13, 0.98]           |
|       | 6-11  | 0.5   | 0.56              | [0.27, 0.98]           |
|       | 12-18 | 0.6   | 0.79              | [0.11, 0.99]           |
|       | 19-35 | 0.4   | 0.54              | [0.35, 1.00]           |
|       | 36+   | 0.5   | 0.60              | [0.33, 0.94]           |
| 6-11  | 6-11  | 0.6   | 0.73              | [0.30, 0.99]           |
|       | 12-18 | 0.4   | 0.43              | [0.17, 0.93]           |
|       | 19-35 | 0.5   | 0.61              | [0.40, 0.86]           |
|       | 36+   | 0.6   | 0.69              | [0.48, 0.98]           |
| 12-18 | 12-18 | 0.4   | 0.43              | [0.21, 0.72]           |
|       | 19-35 | 0.5   | 0.61              | [0.38, 0.95]           |
|       | 36+   | 0.6   | 0.68              | [0.56, 0.79]           |
| 19-35 | 19-35 | 0.4   | 0.60              | [0.38, 1.00]           |
|       | 36+   | 0.5   | 0.66              | [0.52, 0.78]           |
| 36+   | 36+   | 0.6   | 0.94              | [0.47, 1.00]           |

Table 2: At home probabilities used for simulations, mean estimated at home probabilities over 500 simulations, and 2.5% and 97.5% quantiles of the estimates.

| Age   | Truth | Mean of estimates | 95% Quantile Interval |
|-------|-------|-------------------|-----------------------|
| 0-5   | 0.6   | 0.55              | [0.37, 0.75]          |
| 6-11  | 0.7   | 0.67              | [0.51, 0.83]          |
| 12-18 | 0.8   | 0.77              | [0.64, 0.88]          |
| 19-35 | 0.9   | 0.73              | [0.60, 0.83]          |
| 36+   | 0.8   | 0.67              | [0.60, 0.93]          |
